# Supplementary material
Source: PubMed Central journal article supplement (PMC4552318)
Supplement: NIHMS717821-supplement-Supp_data.pdf [file NIHMS717821-supplement-Supp_data.pdf]

# Supplemental Table

## Prospective CTS study

### Additional covariate variables - univariate associations with CTS

| Work environment scales            | Scale cohesion<br>(Cronbach's alpha) | Association with CTS<br>Hazard Ratio (p-value) |         |
|------------------------------------|--------------------------------------|------------------------------------------------|---------|
| Psych Demands <sup>1</sup>         | 0.61                                 | 1.05                                           | (0.23)  |
| Decision Authority <sup>1</sup>    | 0.64                                 | 0.94                                           | (0.03)  |
| Skill Discretion <sup>1</sup>      | 0.76                                 | 0.90                                           | (<0.01) |
| Task Control <sup>2</sup>          | 0.81                                 | 0.99                                           | (0.97)  |
| Task Control expanded <sup>2</sup> | 0.82                                 | 0.87                                           | (0.62)  |
| Mental Demands <sup>2</sup>        | 0.77                                 | 0.67                                           | (0.34)  |
| Supervisor Support <sup>2</sup>    | 0.83                                 | 1.47                                           | (0.19)  |
| Coworker Support <sup>2</sup>      | 0.81                                 | 1.84                                           | (0.08)  |
| Group Pressure <sup>2</sup>        | 0.74                                 | 0.89                                           | (0.77)  |
| Resource Control <sup>2</sup>      | 0.36                                 | 0.25                                           | (0.25)  |
| Depression (POMS) <sup>3</sup>     | 0.63                                 | 1.12                                           | (0.29)  |
| Depression (CES-D) <sup>4</sup>    | 0.85                                 | 1.04                                           | (0.33)  |

1=Karasek's Job Control Questionnaire, job strain = psychological demand vs. control; control = decision authority + skill discretion.

2=NIOSH General Job Stress Questionnaire 3=Profile of Moods Scale 4=CES-D

### General Questionnaire items

|                                 |      |      |
|---------------------------------|------|------|
| overtime (OT) (yes/no)          | 1.21 | 0.73 |
| hours per day usually work      | 1.62 | 0.02 |
| 2nd job (yes/no)                | 0.41 | 0.39 |
| Activities outside work         |      |      |
| hand use (light [L])            | 0.95 | 0.77 |
| arms at chest height L          | 0.90 | 0.67 |
| arms at shoulder height L       | 0.94 | 0.83 |
| hands (moderate – heavy [M])    | 1.06 | 0.78 |
| arms at chest height M          | 0.94 | 0.86 |
| arms at shoulder height M       | 1.00 | 0.99 |
| vibrating tools (low)           | 1.33 | 0.26 |
| vibrating tools (mod-high)      | 1.17 | 0.59 |
| rate your general health        | 1.16 | 0.33 |
| rate your health for age        | 1.03 | 0.89 |
| overall job satisfaction        | 1.07 | 0.82 |
| possible layoff in past year    | 0.79 | 0.41 |
| physically exhausted after work | 1.32 | 0.21 |
| mentally exhausted after work   | 0.88 | 0.61 |
| hand activity at this company   | 1.12 | 0.13 |
| physical effort today           | 1.13 | 0.10 |

|                          |      |      |
|--------------------------|------|------|
| Prior medical conditions |      |      |
| Gout                     | 1.14 | 0.90 |
| Thyroid disease          | 1.20 | 0.81 |
| High blood pressure      | 2.21 | 0.06 |
| Migraine headaches       | 0.62 | 0.52 |
| Diabetes                 | 0.00 | 0.99 |
| Rheumatoid arthritis     | 1.54 | 0.40 |
